# Supplementary material for: Characterization of Emissions from Liquid Fuel and Propane Open Burns
Source: Springer Nature journal article supplement (doi:10.1007/s10694-017-0670-2), 2017-08-03
Supplement: MOESM1 [file 13348874]

Characterization of Emissions

from Liquid Fuel and Propane Open Burns

*Johanna Aurell1, David Hubble2, Brian K. Gullett*3, Amara Holder3, Ephraim Washburn4, Dennis Tabor3*

1University of Dayton Research Institute, 300 College Park, Dayton, OH 45469, USA

2Naval Surface Warfare Center Dahlgren Division, Dahlgren, VA 22485, USA

3U.S. Environmental Protection Agency, Office of Research and Development, National Risk Management Research Laboratory, Research Triangle Park, NC 27711, USA

4Naval Air Warfare Center Weapons Division, China Lake, CA 93555, USA

Tables: 1

Table S1. VOC emission factors.

|  | **JP-5** | | | **Propane** | | |
| --- | --- | --- | --- | --- | --- | --- |
| **Compound** | **Average** | **STDV** | **RPD** | **Average** | **STDV** | **RPD** |
|  | **mg/kg fuel** | **mg/kg fuel** | **%** | **mg/kg fuel** | **mg/kg fuel** | **%** |
| Propene | 9.83E+01 | 7.02E+01 |  | 1.01E+02 | 7.66E+01 |  |
| Dichlorodifluoromethane (CFC 12) | ND |  |  | ND |  |  |
| Chloromethane | 1.13E+00 | 9.06E-01 |  | 5.10E-02 |  | 5.58E+01 |
| 1,2-Dichloro-1,1,2,2- tetrafluoroethane (CFC 114) | ND |  |  | ND |  |  |
| Vinyl Chloride | ND |  |  | ND |  |  |
| 1,3-Butadiene | 4.20E+01 | 2.76E+01 |  | ND |  |  |
| Bromomethane | ND |  |  | ND |  |  |
| Chloroethane | ND |  |  | ND |  |  |
| Ethanol | 9.62E+01 | 1.99E+01 |  | 6.77E+01 |  |  |
| Acetonitrile | 6.87E+00 | 6.09E+00 |  | 2.36E+00 | 2.50E+00 |  |
| Acrolein | 8.15E+01 | 5.42E+01 |  | 9.61E+00 | 6.87E+00 |  |
| Acetone | 2.86E+01 |  | 6.62E+01 | 1.35E+01 | 1.33E+01 |  |
| Trichlorofluoromethane | ND |  |  | ND |  |  |
| 2-Propanol (Isopropyl Alcohol) | 5.65E+00 |  |  | ND |  |  |
| Acrylonitrile | ND |  |  | ND |  |  |
| 1,1-Dichloroethene | ND |  |  | ND |  |  |
| Methylene Chloride | 1.06E+01 |  | 1.79E+02 | 2.18E-01 |  | 6.48E+01 |
| 3-Chloro-1-propene (Allyl Chloride) | ND |  |  | ND |  |  |
| Trichlorotrifluoroethane | 6.95E-01 |  |  | 1.10E-01 |  |  |
| Carbon Disulfide | 1.37E+01 | 2.16E+01 |  | 5.47E+00 |  | 1.84E+02 |
| trans-1,2-Dichloroethene | ND |  |  | ND |  |  |
| 1,1-Dichloroethane | ND |  |  | ND |  |  |
| Methyl tert-Butyl Ether | ND |  |  | ND |  |  |
| Vinyl Acetate | 5.65E+00 |  |  | 3.59E+00 |  |  |
| 2-Butanone (MEK) | 1.25E+01 | 4.47E+00 |  | 3.81E+00 | 1.35E+00 |  |
| cis-1,2-Dichloroethene | ND |  |  | ND |  |  |
| Ethyl Acetate | 3.94E+01 |  | 1.75E+02 | 1.23E+01 |  |  |
| n-Hexane | 1.31E+01 | 1.38E+01 |  | 4.46E+00 |  |  |
| Chloroform | ND |  |  | ND |  |  |
| Tetrahydrofuran (THF) | 2.07E+01 |  |  | ND |  |  |
| 1,2-Dichloroethane | ND |  |  | ND |  |  |
| 1,1,1-Trichloroethane | ND |  |  | ND |  |  |
| Benzene | 1.25E+03 | 6.29E+02 |  | 2.50E+00 | 2.07E+00 |  |
| Carbon Tetrachloride | ND |  |  | 1.06E-01 | 9.63E-02 |  |
| Cyclohexane | 9.80E+00 |  | 1.25E+02 | ND |  |  |
| 1,2-Dichloropropane | ND |  |  | ND |  |  |
| Bromodichloromethane | ND |  |  | ND |  |  |
| Trichloroethene | ND |  |  | 1.69E+00 |  |  |
| 1,4-Dioxane | ND |  |  | ND |  |  |
| Methyl Methacrylate | ND |  |  | ND |  |  |
| n-Heptane | 8.10E+00 |  | 3.90E+01 | 1.94E+00 |  |  |
| cis-1,3-Dichloropropene | ND |  |  | ND |  |  |
| 4-Methyl-2-pentanone | 3.17E+00 |  |  | ND |  |  |
| trans-1,3-Dichloropropene | ND |  |  | ND |  |  |
| 1,1,2-Trichloroethane | ND |  |  | ND |  |  |
| Toluene | 7.13E+01 | 1.97E+01 |  | 5.12E+00 |  | 1.68E+02 |
| 2-Hexanone | 2.04E+00 |  |  | ND |  |  |
| Dibromochloromethane | ND |  |  | ND |  |  |
| 1,2-Dibromoethane | ND |  |  | ND |  |  |
| n-Butyl Acetate | ND |  |  | ND |  |  |
| n-Octane | 6.47E+00 |  | 1.42E+02 | 1.73E+00 |  |  |
| Tetrachloroethene | ND |  |  | ND |  |  |
| Chlorobenzene | ND |  |  | ND |  |  |
| Ethylbenzene | 9.23E+00 | 5.74E+00 |  | ND |  |  |
| m,p-Xylenes | 2.25E+01 |  | 1.07E+02 | 4.61E+00 |  |  |
| Bromoform | ND |  |  | ND |  |  |
| Styrene | 4.09E+01 | 2.48E+01 |  | ND |  |  |
| o-Xylene | 9.69E+00 | 5.08E+00 |  | ND |  |  |
| n-Nonane | 7.62E+00 | 5.04E+00 |  | 1.58E+00 |  |  |
| 1,1,2,2-Tetrachloroethane | ND |  |  | ND |  |  |
| Cumene | ND |  |  | ND |  |  |
| alpha-Pinene | 1.50E+01 | 1.00E+01 |  | 2.57E-01 |  |  |
| n-Propylbenzene | ND |  |  | ND |  |  |
| 4-Ethyltoluene | 1.43E+00 |  |  | ND |  |  |
| 1,3,5-Trimethylbenzene | 1.39E+00 |  |  | ND |  |  |
| 1,2,4-Trimethylbenzene | 1.58E+01 | 9.92E+00 |  | ND |  |  |
| Benzyl Chloride | ND |  |  | ND |  |  |
| 1,3-Dichlorobenzene | ND |  |  | ND |  |  |
| 1,4-Dichlorobenzene | ND |  |  | ND |  |  |
| 1,2-Dichlorobenzene | ND |  |  | ND |  |  |
| d-Limonene | 5.58E+00 |  | 8.39E+00 | 3.68E-01 |  |  |
| 1,2-Dibromo-3-chloropropane | ND |  |  | ND |  |  |
| 1,2,4-Trichlorobenzene | ND |  |  | ND |  |  |
| Hexachlorobutadiene | ND |  |  | ND |  |  |
| formaldehyde | 3.22E+02 | 2.09E+02 |  | 4.19E+01 | 1.25E+01 |  |
| acetaldehyde | 9.35E+01 | 8.21E+01 |  | 1.72E+01 | 2.76E+00 |  |
| benzaldehyde | 8.11E+01 | 5.86E+01 |  | ND |  |  |
| crotonaldehyde | ND |  |  | ND |  |  |
| butyraldehyde | ND |  |  | ND |  |  |
| Propanal | ND |  |  | ND |  |  |
| isovaleraldehyde | ND |  |  | ND |  |  |
| valeraldehyde | ND |  |  | ND |  |  |
| o-tolualdehyde | ND |  |  | ND |  |  |
| m-tolualdehyde | ND |  |  | ND |  |  |
| p-tolualdehyde | ND |  |  | ND |  |  |
| hexaldehyde | ND |  |  | ND |  |  |
| 25-dimethylbenzaldehyde | ND |  |  | ND |  |  |
